# Supplementary material for: Fabrication of a novel AIE active chemosensor for selective detection of Pd( ii ) and picric acid: extended detection in the HeLa cancer cell line
Source: Royal Society of Chemistry journal article supplement (doi:10.1039/d4nj04935g), 2025-01-01
Supplement: d4nj04935g1.pdf [file d4nj04935g1.pdf]

## **Fabrication of novel AIE active chemosensor for selective detection of Pd(II) and picric acid: extended detection in HeLa cancer cell line**

Susmita Das<sup>a</sup>, Manik Das<sup>a</sup>, Raju Biswas<sup>b</sup>, Uttam Kumar Das<sup>c</sup>, Soumik Laha<sup>d</sup>, Bidhan Chandra Samanta<sup>e</sup>, Indranil Choudhuri<sup>f</sup>, Nandan Bhattacharya<sup>f</sup>, Tithi Maity<sup>a\*</sup>

<sup>a</sup> Department of Chemistry, Prabhat Kumar College, Contai, Purba Medinipur, West Bengal, 721404, India

<sup>b</sup> School of Chemical Sciences, IACS Kolkata, Kolkata, West Bengal, India

<sup>c</sup> Department of Chemistry, School of Physical Science, Mahatma Gandhi Central University, Bihar, India

<sup>d</sup> IICB, Kolkata, Jadavpur, West Bengal, India

<sup>e</sup> Department of Chemistry, Mugberia Gangadhar Mahavidyalaya, Purba Medinipur, India

<sup>f</sup> Department of Biotechnology, Panskura Banamali College, Purba Medinipur, West Bengal, India

Email: [titlipkc2008@gmail.com](mailto:titlipkc2008@gmail.com)

| <b>Fig./Table No</b> | <b>Content</b>                                                                                                                                                                           | <b>Page number</b> |
|----------------------|------------------------------------------------------------------------------------------------------------------------------------------------------------------------------------------|--------------------|
| <b>Fig. S1</b>       | FTIR spectrum of <b>RBSB</b>                                                                                                                                                             | S4                 |
| <b>Fig. S2</b>       | UV spectrum of <b>RBSB</b>                                                                                                                                                               | S4                 |
| <b>Fig. S3</b>       | Mass spectrum of <b>RBSB</b>                                                                                                                                                             | S5                 |
| <b>Fig. S4</b>       | <sup>1</sup> H NMR spectrum of <b>RBSB</b>                                                                                                                                               | S5                 |
| <b>Fig. S5</b>       | <sup>13</sup> C NMR spectrum of <b>RBSB</b>                                                                                                                                              | S6                 |
| <b>Fig. S6</b>       | The emission intensity of <b>RBSB</b> in different solvents with polarity difference                                                                                                     | S6                 |
| <b>Fig. S7</b>       | The emission intensity enhancement of the probe <b>RBSB</b> in glycerol-water, THF-water, DMSO-water AIE active solvents indicating high AIE active performance in 1:9 DMSO water medium | S7                 |
| <b>Fig. S8</b>       | Absorbance changes of <b>RBSB</b> after Changing the water percentage from 0% to 90%.                                                                                                    | S7                 |
| <b>Fig. S9</b>       | Observation of the particle size change by increasing the water fraction with the help of DLS measurement in AIE medium                                                                  | S8                 |
| <b>Fig. S10</b>      | SEM image of aggregated <b>RBSB</b> particle as a result of AIE behavior with a scale bar of 100 nm in AIE medium                                                                        | S8                 |
| <b>Fig. S11</b>      | Change of Absorbance of <b>RBSB</b> ( $2 \times 10^{-6}$ M) as a function of time in AIE solution                                                                                        | S9                 |
| <b>Fig. S12</b>      | Emission intensity change of <b>RBSB</b> ( $3 \times 10^{-6}$ M) in the presence (five equivalent) of several cations including Pd(II) in AIE medium at 526 nm                           | S9                 |
| <b>Fig. S13</b>      | Demonstration of pH effect on the emission intensity of the probe in the presence and the absence of target analyte in 9:1 DMSO-water and 1:9 DMSO water(AIE active) medium.             | S10                |
| <b>Fig. S14</b>      | Determination of LOD value during detection of Pd(II) by the probe <b>RBSB</b> in DMSO– H <sub>2</sub> O AIE medium                                                                      | S10                |
| <b>Fig. S15</b>      | Effect of response time on the emission intensity of the probe in the presence of Pd(II)                                                                                                 | S11                |
| <b>Fig. S16</b>      | Binding constant determination plot for <b>RBSB</b> -Pd(II) adduct in AIE active medium                                                                                                  | S11                |
| <b>Fig. S17</b>      | Lifetime measurement of <b>RBSB</b> in the presence and the absence of Pd(II) in AIE active medium.                                                                                      | S12                |

|                   |                                                                                                                                                                                                     |     |
|-------------------|-----------------------------------------------------------------------------------------------------------------------------------------------------------------------------------------------------|-----|
| <b>Fig. S18</b>   | The variation of fluorescence intensity of <b>RBSB</b> after alternative addition Pd(II) and thiourea, disclosing the existence of reversibility.                                                   | S13 |
| <b>Fig. S19</b>   | Change of Emission Intensity of <b>RBSB</b> – Pd(II) adduct in the presence of several competitive metal ions to check the competitive ion effect in AIE medium.                                    | S13 |
| <b>Fig. S20</b>   | Change of Emission intensity of <b>RBSB</b> ( $3 \times 10^{-5}$ M) after separate addition of different nitroaromatic compounds (NACs) in AIE active solvent                                       | S14 |
| <b>Fig. S21</b>   | Change of emission intensity of <b>RBSB</b> by the addition of PA to measure the limit of detection (LOD)                                                                                           | S14 |
| <b>Fig. S22</b>   | Effect of response time on the emission intensity of the probe <b>RBSB</b> in the presence of TNP b) Emission intensity change of <b>RBSB</b> -TNP adduct with the presence of other individual NAC | S15 |
| <b>Fig. S23</b>   | Jobs plot During sensing of a) Pd(II) b) PA by <b>RBSB</b> suggesting the 1:1 probe -analyte combination                                                                                            | S15 |
| <b>Fig. S24</b>   | Mass spectra of <b>RBSB</b> after mixing with Pd(II) in 1:1 ratio                                                                                                                                   | S16 |
| <b>Fig. S25</b>   | The DFT optimized ground state geometry of the probe and the probe-analyte complexes.                                                                                                               | S16 |
| <b>Fig. S26</b>   | Dose-dependent suppression of cell viability of <b>RBSB</b> on HeLa cell line (24 hrs)                                                                                                              | S17 |
| <b>Table S1</b>   | Intra-molecular Hydrogen bonding parameter of <b>RBSB</b>                                                                                                                                           | S17 |
| <b>Table S2</b>   | C-H...O interaction parameters of <b>RBSB</b>                                                                                                                                                       | S17 |
| <b>Table S3</b>   | Lifetime decay parameters for <b>RBSB</b> in the presence and absence of Pd(II) in AIE active medium                                                                                                | S18 |
| <b>Table S4</b>   | Comparative study of literature reported probes for Pd(II) detection                                                                                                                                | S18 |
| <b>References</b> |                                                                                                                                                                                                     | S19 |

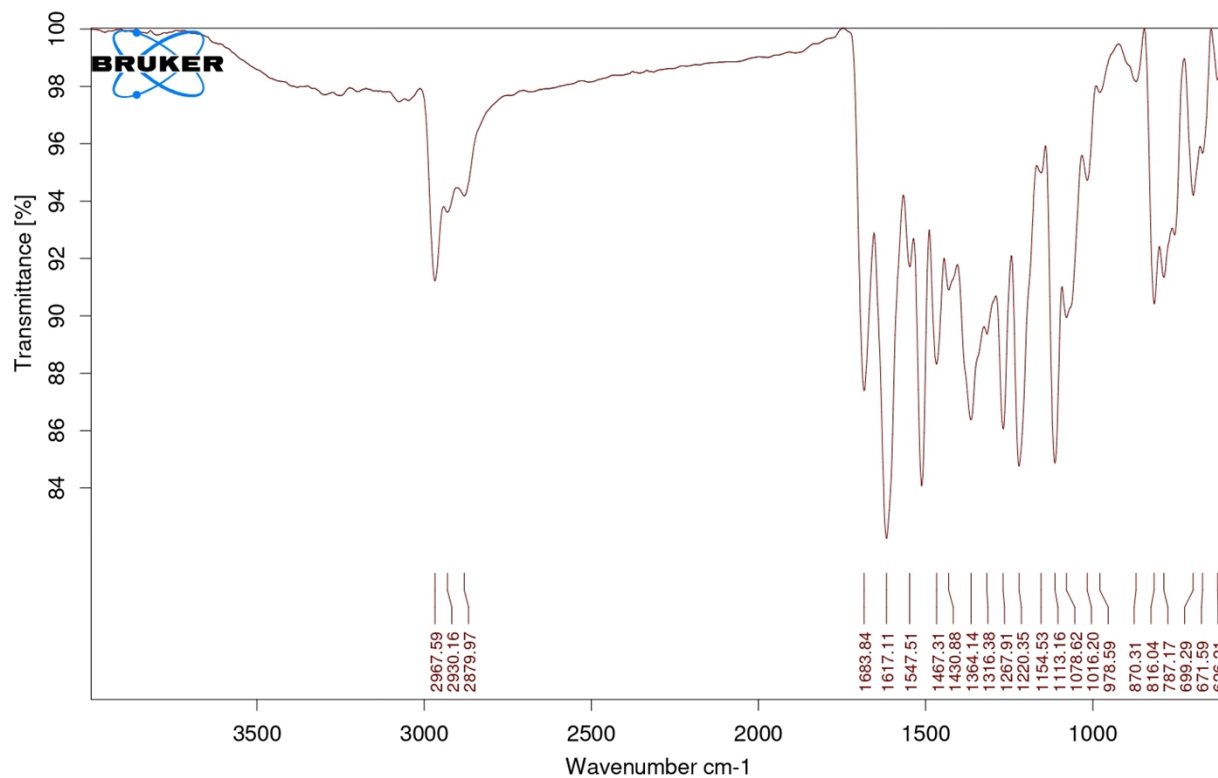

**Fig. S1:** FTIR spectrum RBSB

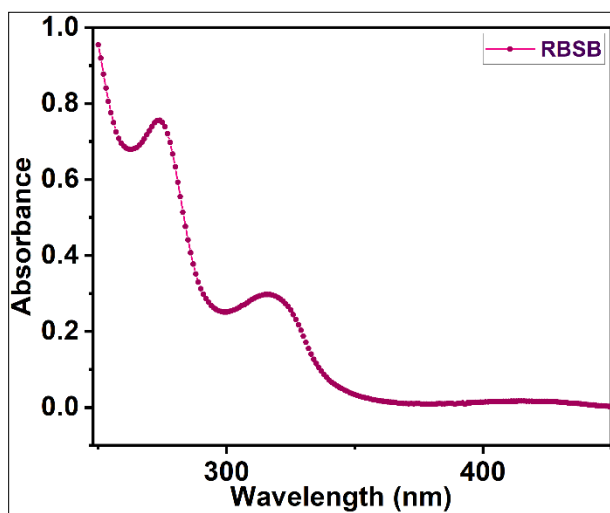

**Fig. S2:** UV spectrum RBSB

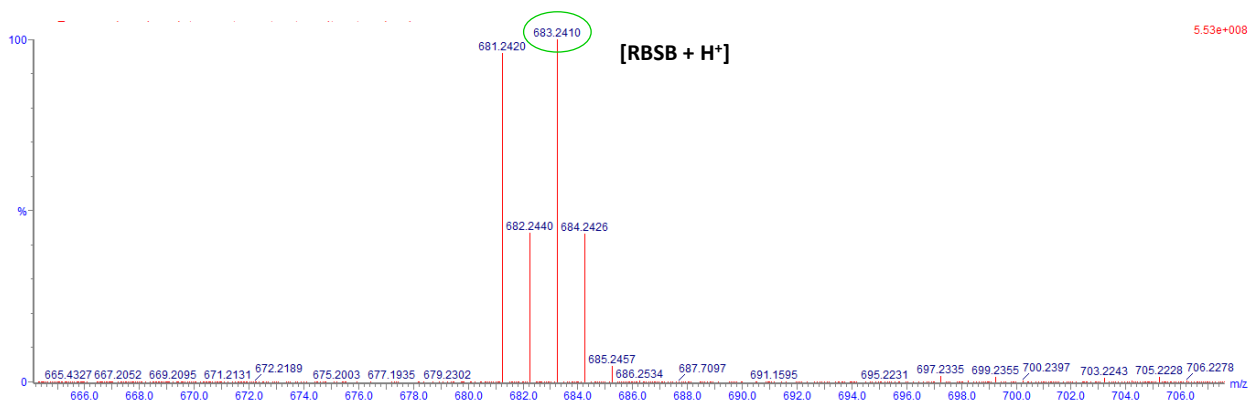

Fig. S3: Mass spectra of RBSB

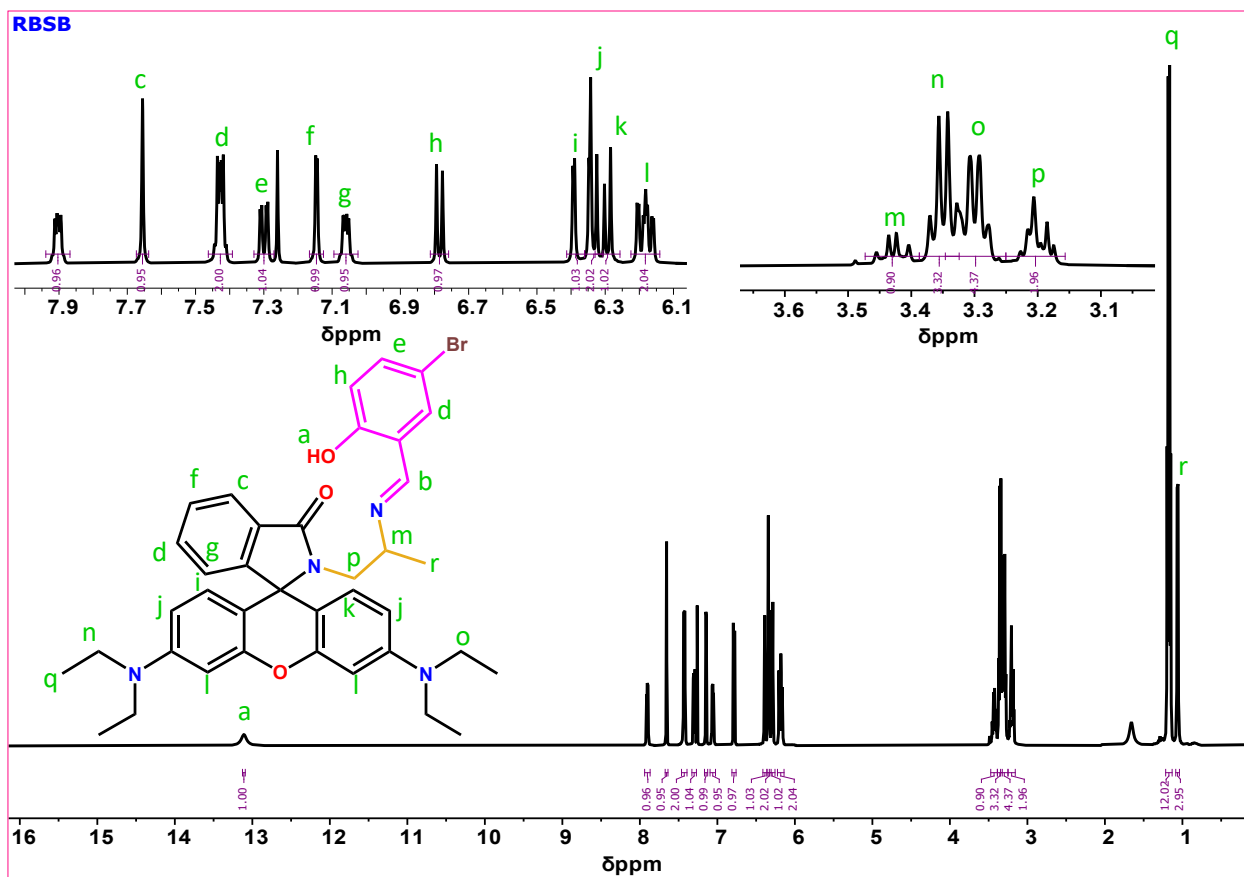

Fig. S4: <sup>1</sup>H NMR spectrum of RBSB

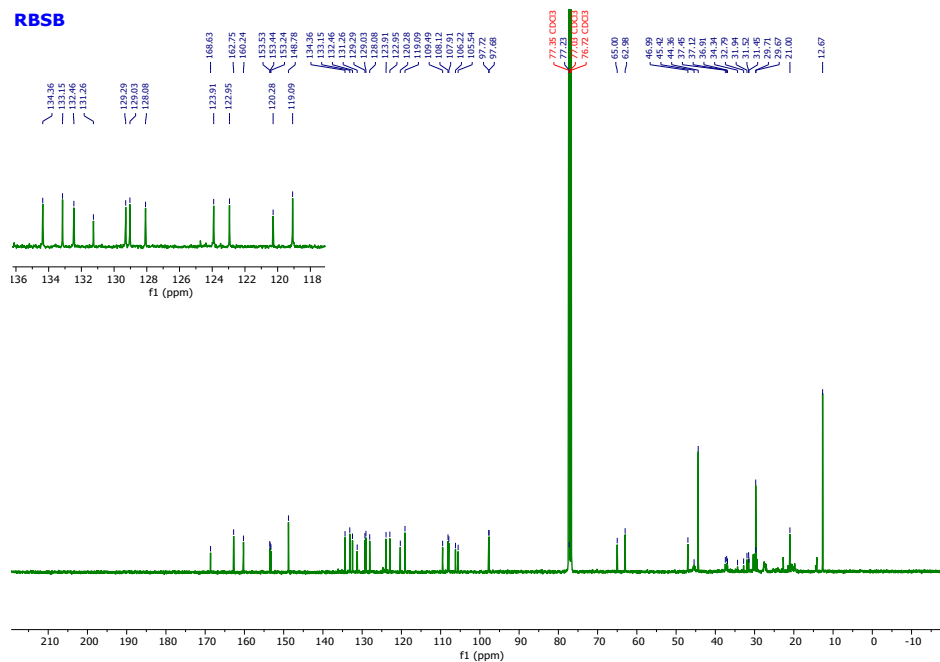

Fig. S5:  $^{13}\text{C}$  NMR spectrum of RBSB

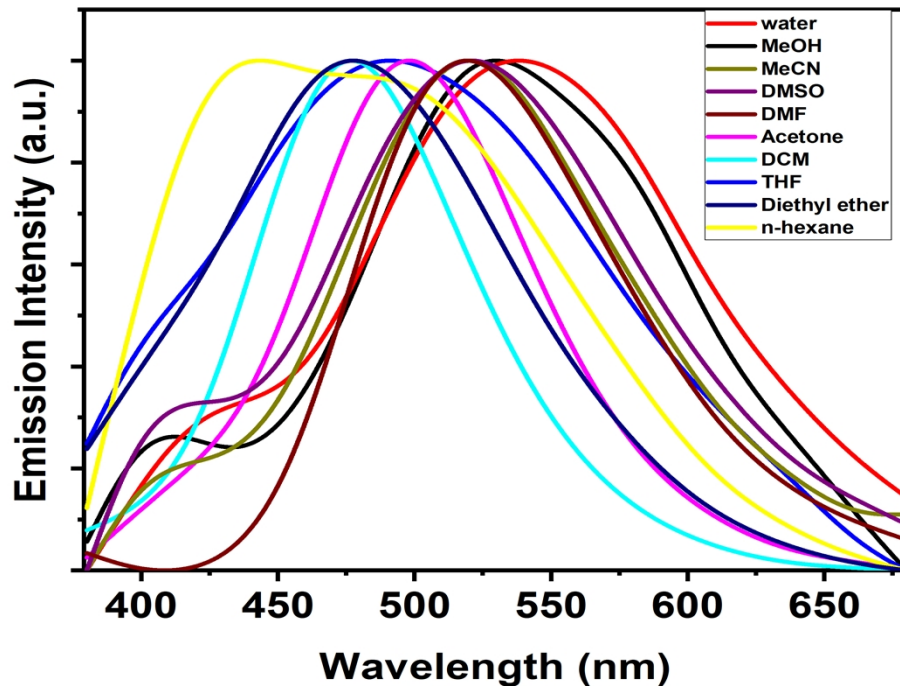

Fig. S6: Emission intensity of RBSB ( $2\ \mu\text{M}$ ) in different solvents with polarity difference

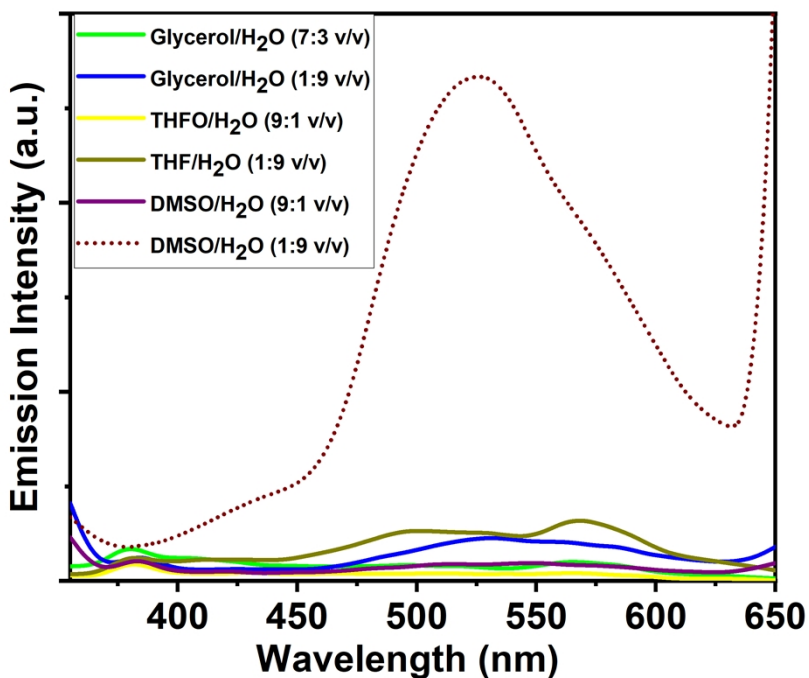

Fig. S7: The emission intensity enhancement of the probe **RBSB** in glycerol-water, THF-water, DMSO-water AIE active solvents indicating high AIE active performance in 1:9 DMSO water medium

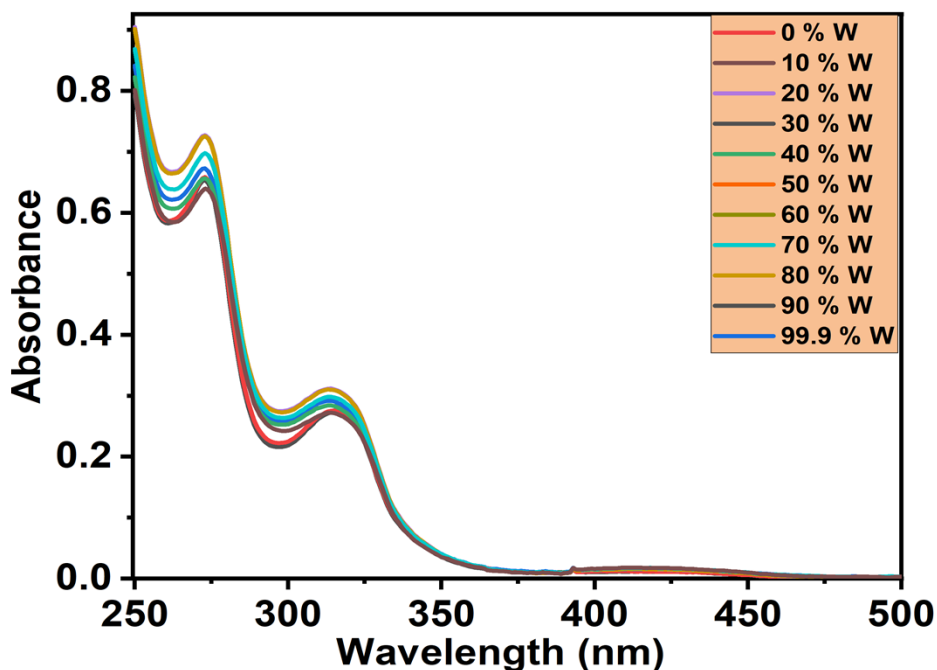

Fig. S8: Change of absorbance spectra of **RBSB** upon increasing volume percentages of water from 0% to 90% in DMSO-water AIE active medium.

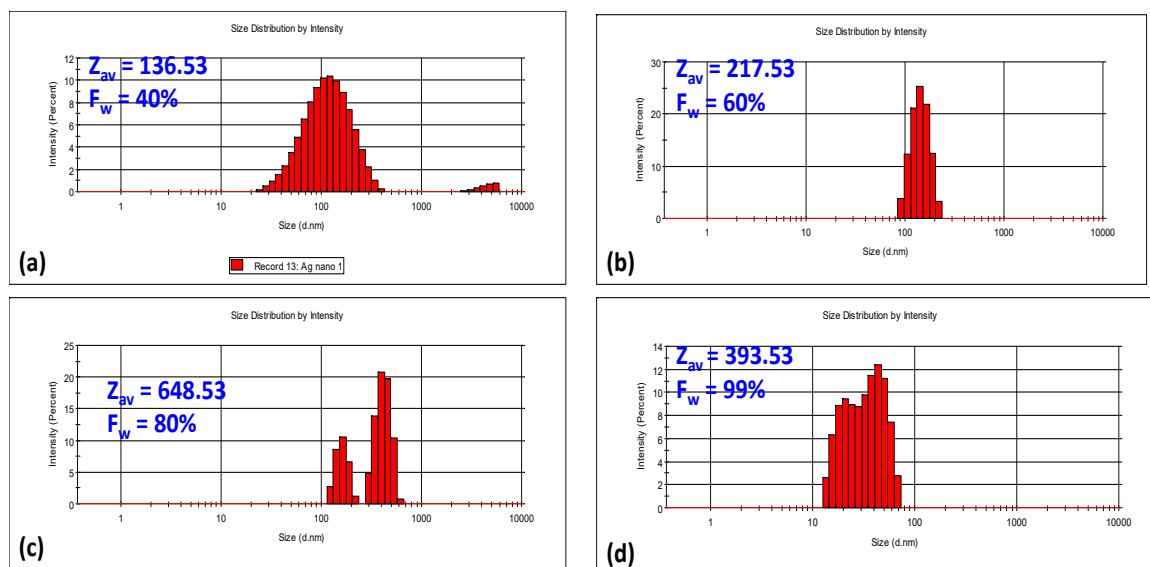

**Fig. S9:** Observation of the particle size change by enhancement of the water fraction with the help of DLS measurement in DMSO – H<sub>2</sub>O medium

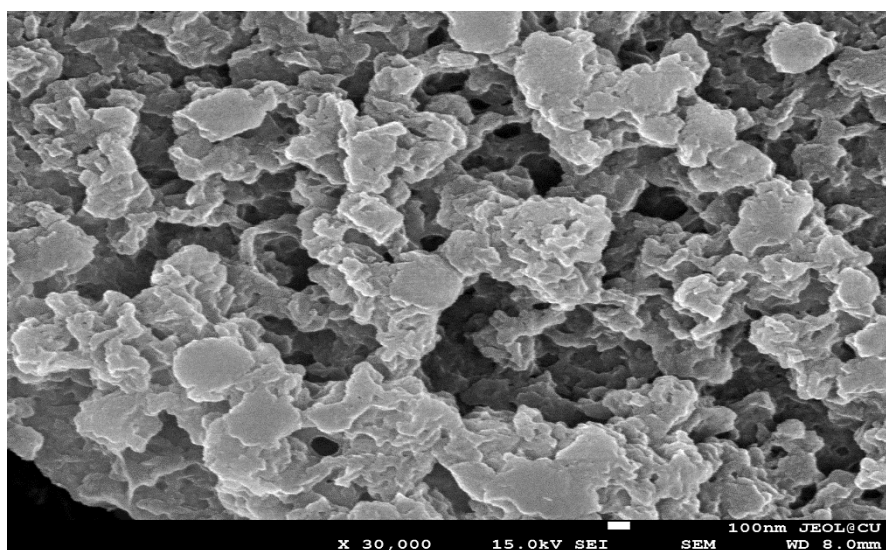

**Fig. S10.** SEM image of aggregated **RBSB** particle as a result of AIE behavior with a scale bar of (I) 1 mM and (II) 100 nm in DMSO – H<sub>2</sub>O (1:9 v/v) medium



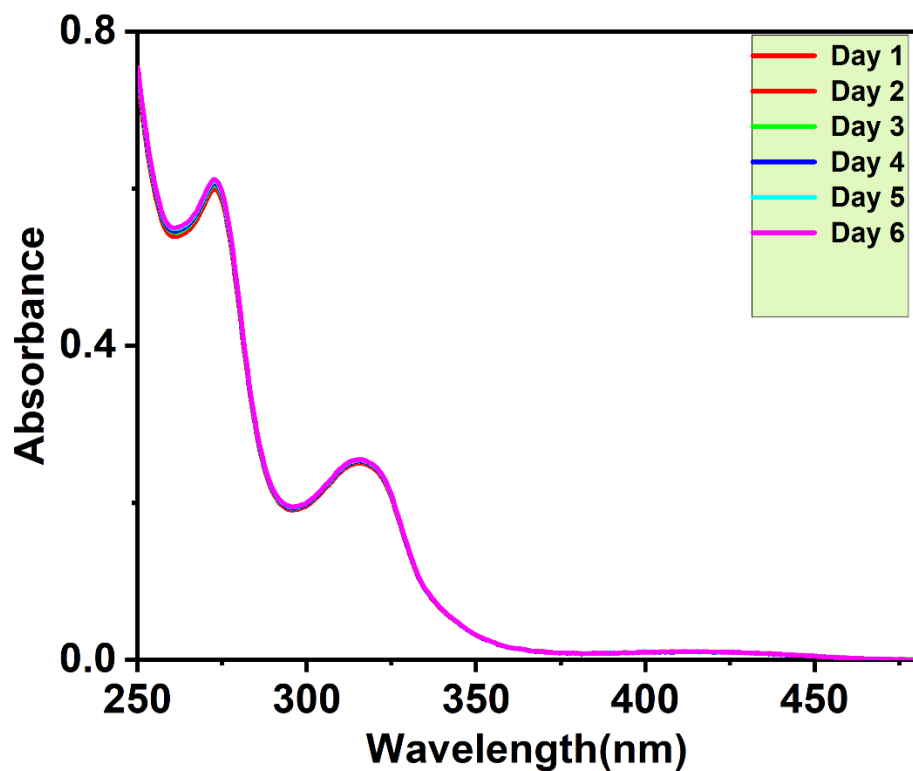

**Fig. S11:** Change of Absorbance of RBSB ( $2 \times 10^{-6}$  M) as a function of time in DMSO – H<sub>2</sub>O (1:9 v/v) solvent system

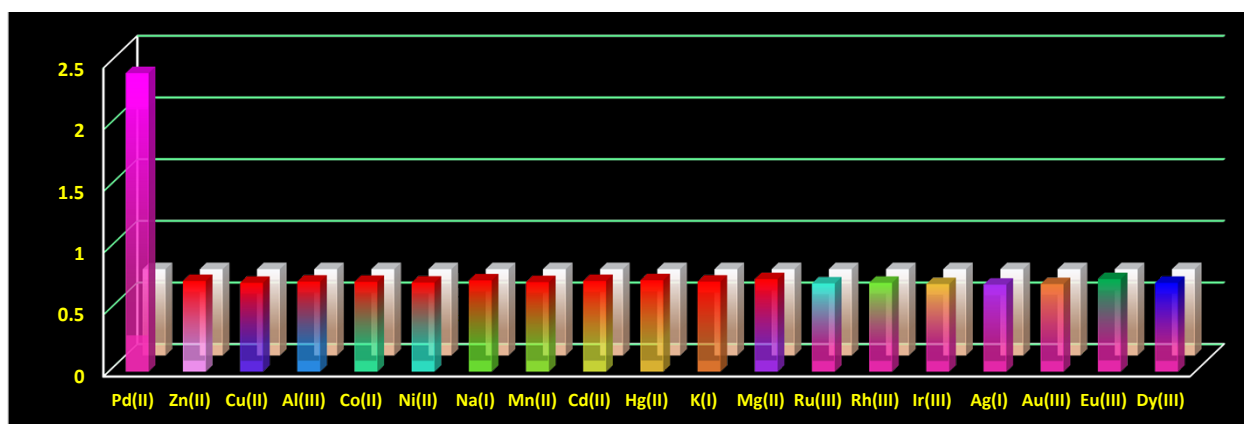

**Fig. S12:** Emission intensity change of RBSB ( $3 \times 10^{-6}$  M) in the presence (five equivalent) of several cations including Pd(II) in DMSO-water (1:9) AIE medium over excitation at 326 nm.

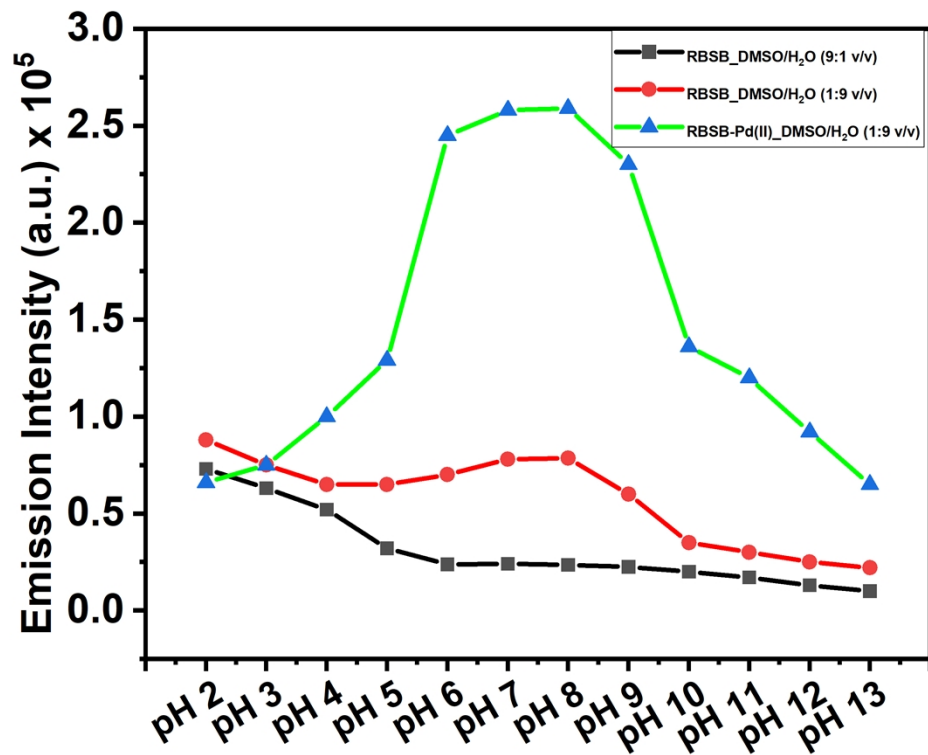

Fig. S13: Demonstration of pH effect on the emission intensity of the probe in the presence and the absence of target analyte in 9:1 DMSO-water and 1:9 DMSO water(AIE active) medium.

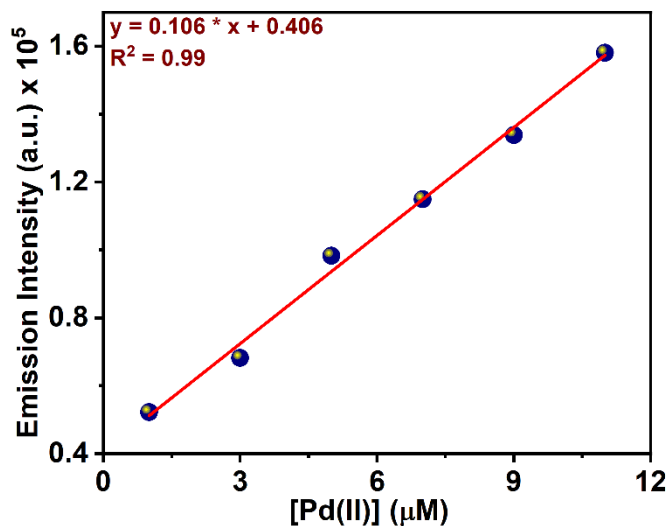

Fig. S14: Determination of LOD value during detection of Pd(II) by the probe **RBSB** in DMSO–H<sub>2</sub>O AIE medium

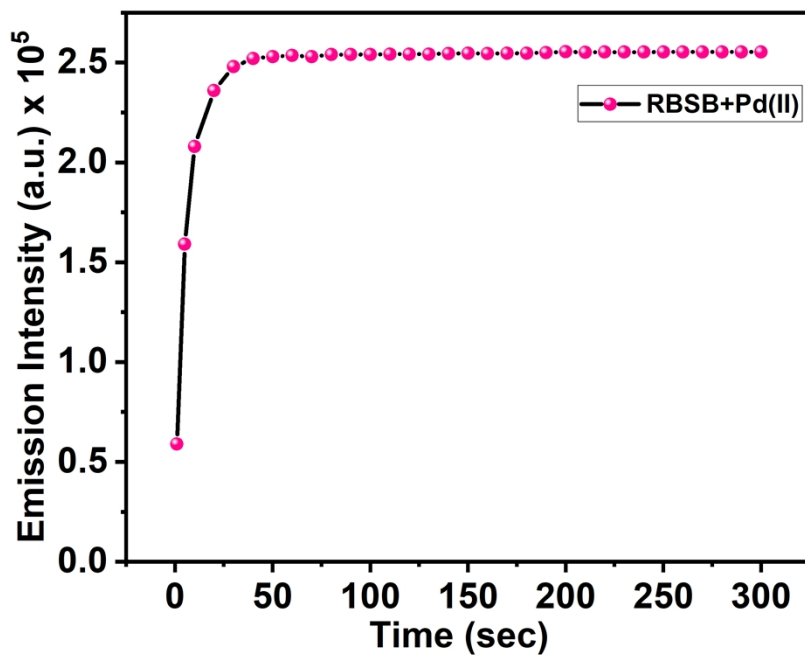

Fig. 15: Effect of response time on the emission intensity of the probe in the presence of Pd(II)

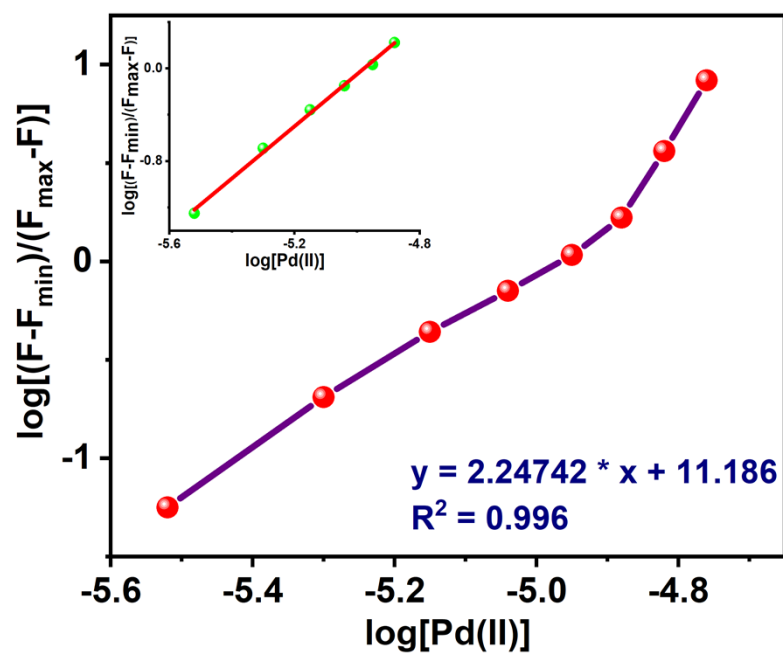

Fig. S16: Binding constant determination plot for **RBSB**-Pd(II) adduct in AIE active medium

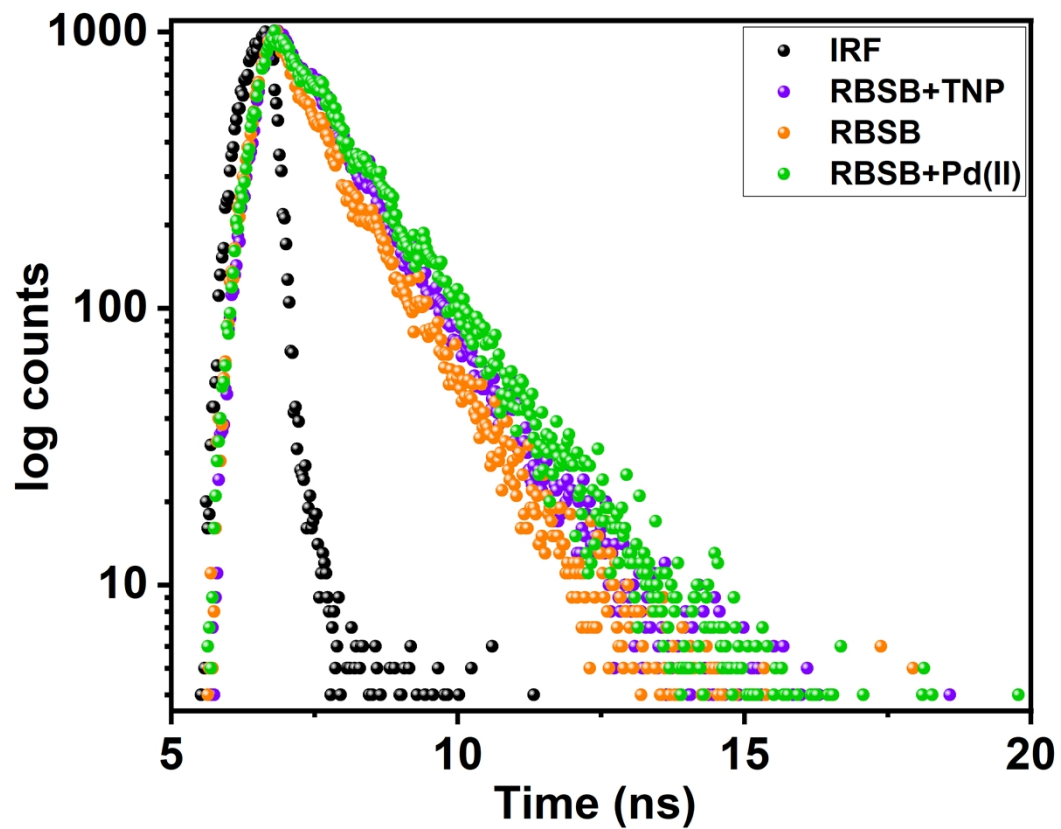

**Fig. S17:** Lifetime measurement of RBSB in the presence and the absence of Pd(II) and TNP in AIE active medium.

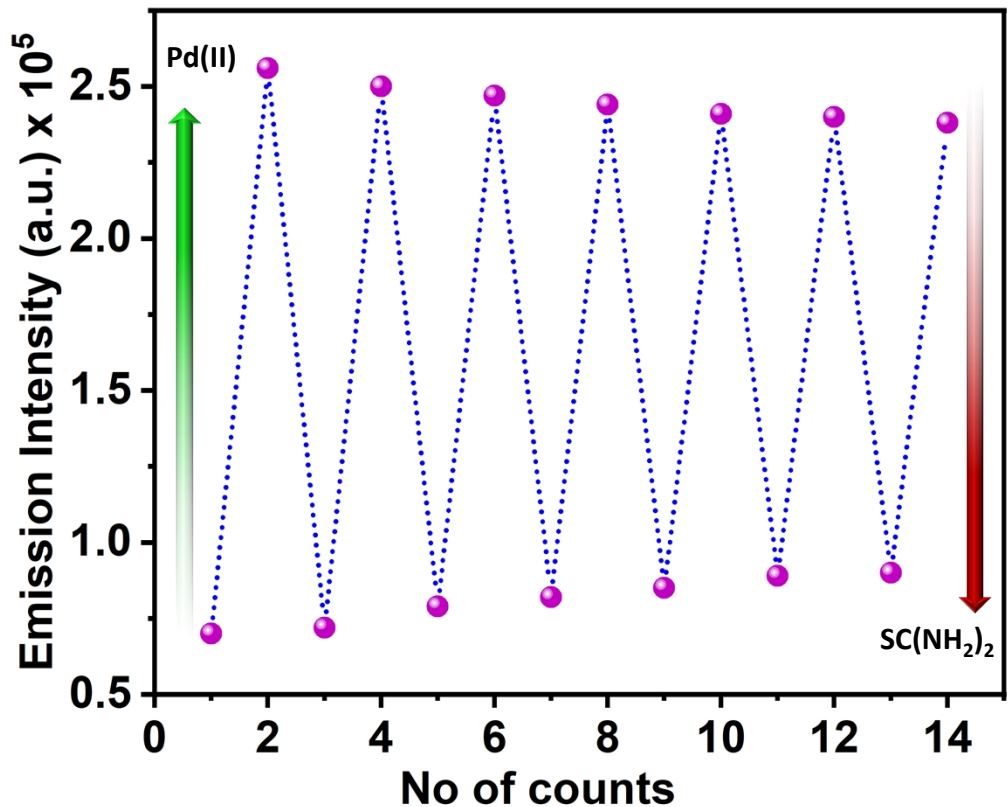

Fig. S18: The variation of fluorescence intensity of **RBSB** after alternative addition Pd(II) and thiourea, disclosing the existence of reversibility.

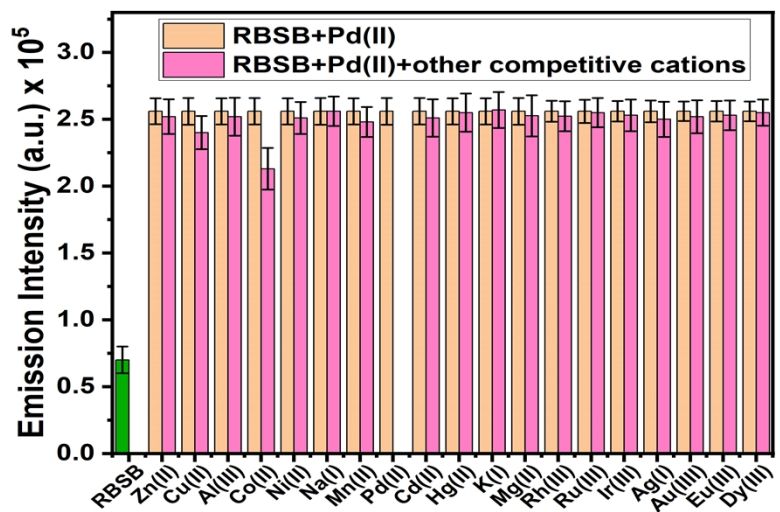

Fig. S19: Change of Emission Intensity of **RBSB** – Pd(II) adduct in the presence of several competitive metal ions to check the competitive ion effect in DMSO-water AIE active medium.

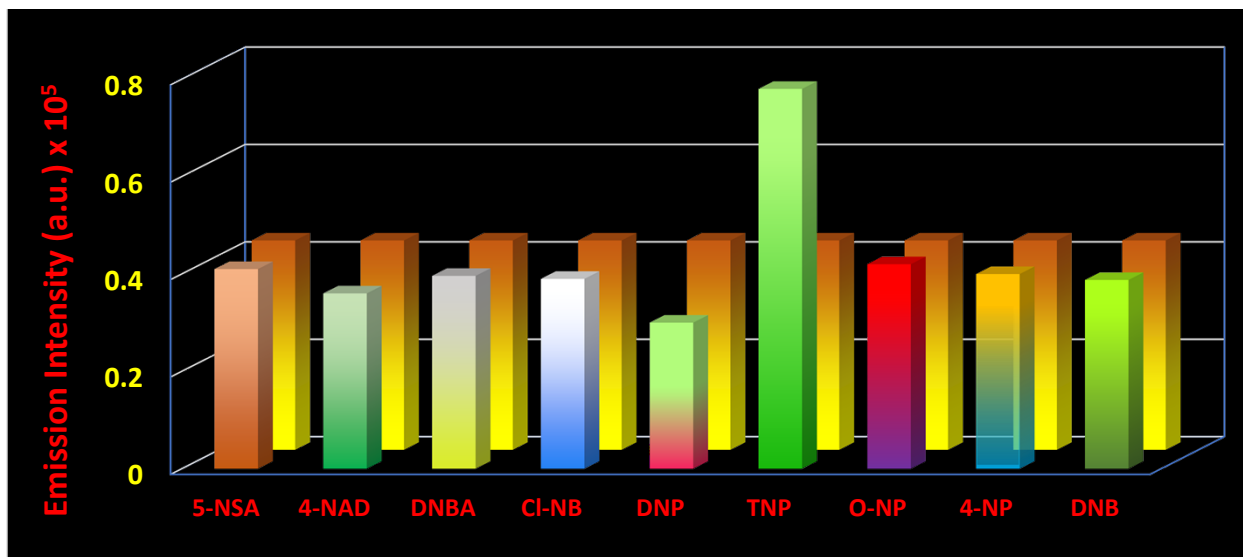

**Fig. S20:** Change of Emission intensity of **RBSB** ( $3 \times 10^{-5}$  M) after separate addition of different nitroaromatic compounds (NACs) in AIE active medium

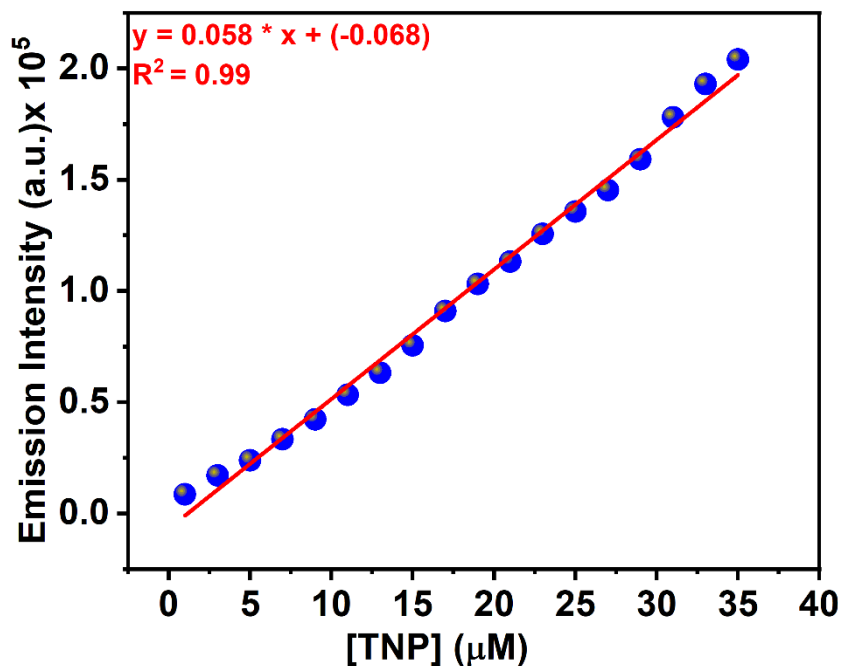

**Fig. S21:** Change of emission intensity of **RBSB** by the addition of PA to measure the limit of detection (LOD)

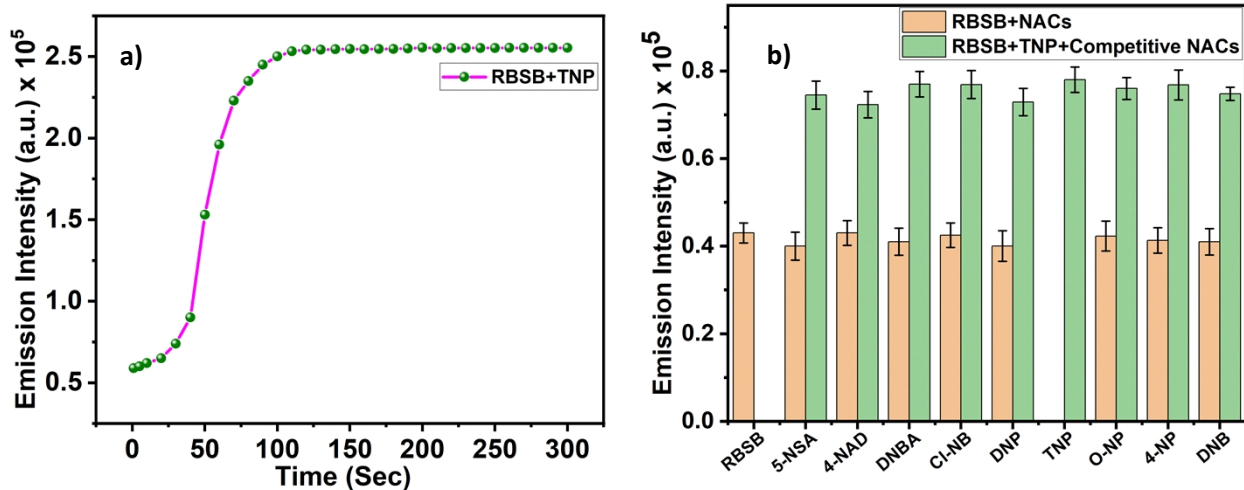

**Fig. 22:** a) Effect of response time on the emission intensity of the probe **RBSB** in the presence of TNP b) Emission intensity change of RBSB-TNP adduct with the presence of other individual NAC

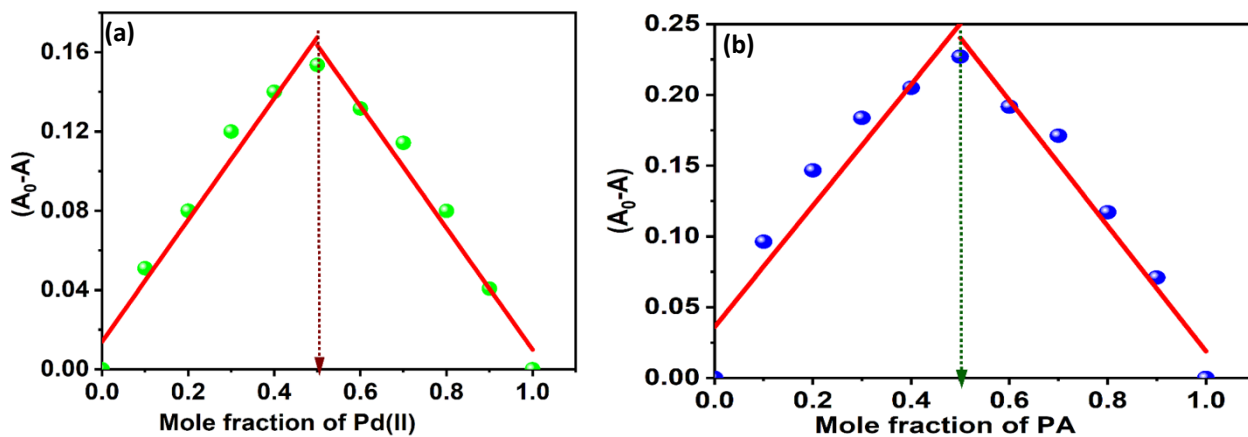

**Fig. S23.** Jobs plot During sensing of a) Pd(II) b) PA by **RBSB** suggesting the 1:1 probe -analyte combination

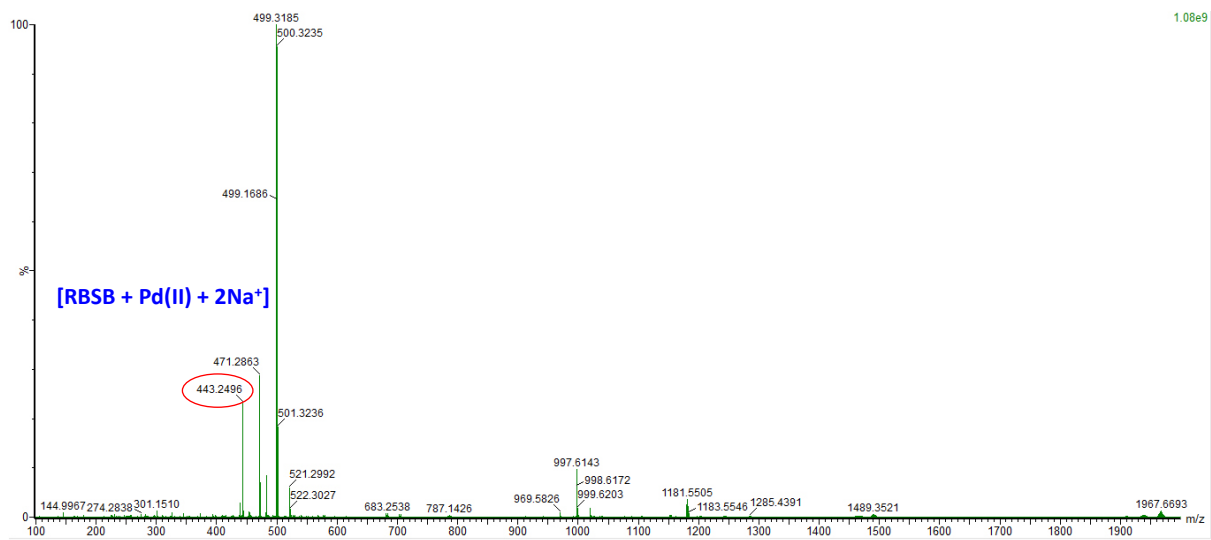

**Fig. S24:** Mass spectra of RBSB after mixing with Pd(II) in 1:1 ratio

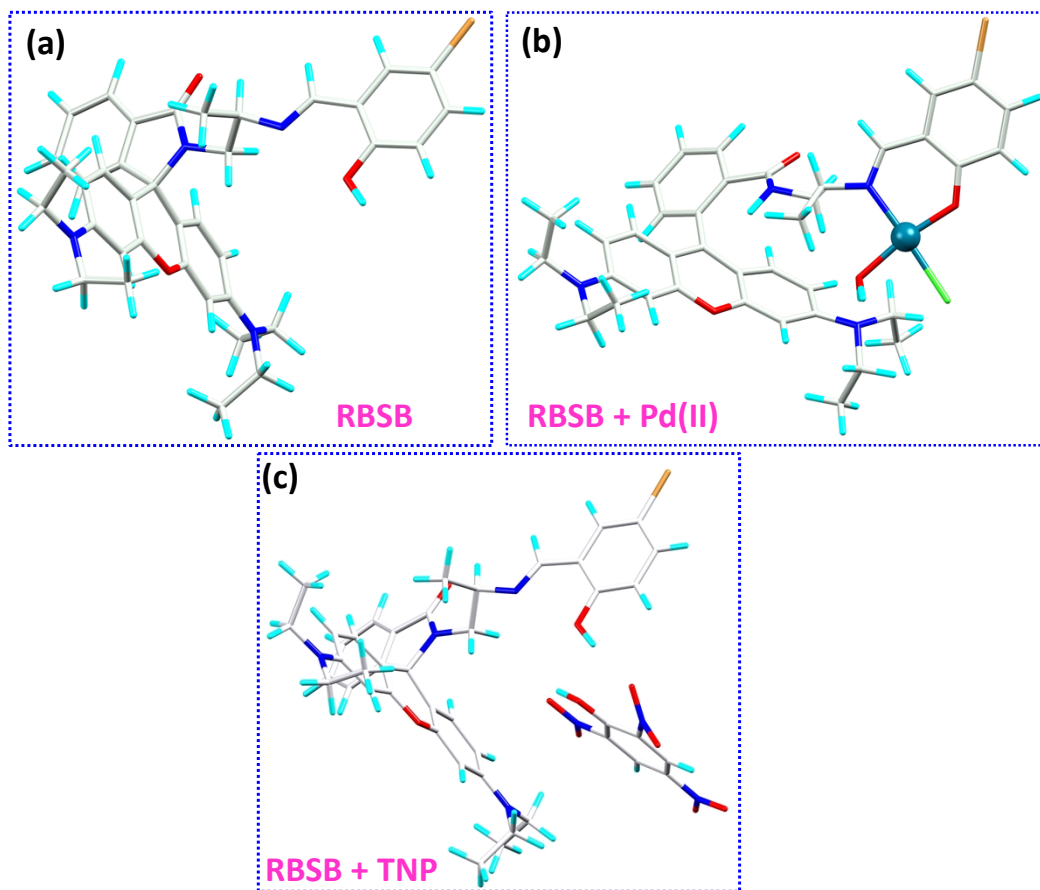

**Fig. S25:** The DFT optimized ground state geometry of the probe and the probe-analyte complexes.



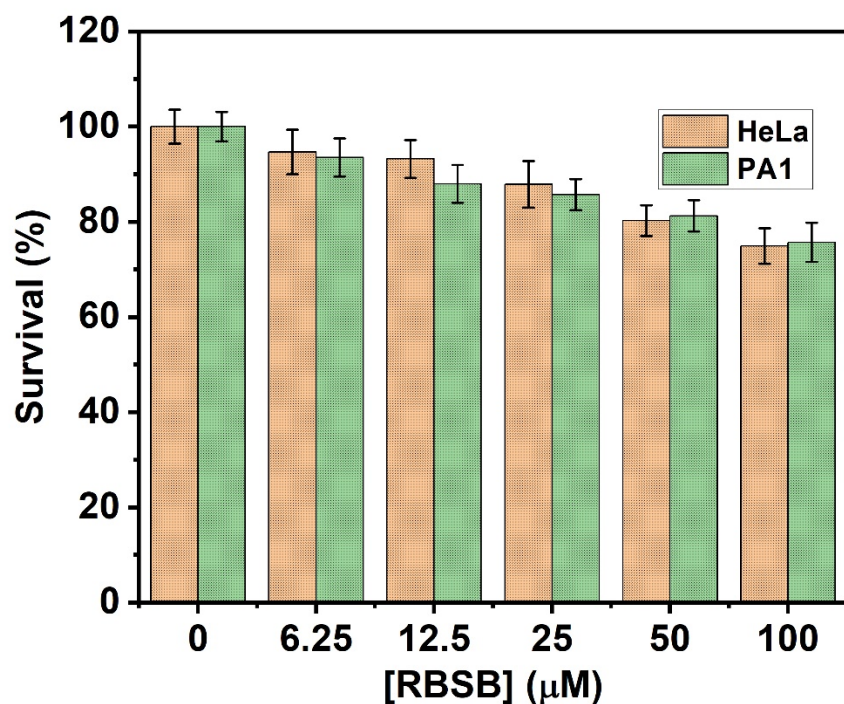

**Fig. S26:** Dose-dependent suppression of cell viability of **RBSB** on HeLa and PA1 cell line (24 hrs)

**Table S1:** Intra-molecular Hydrogen bonding parameter of **RBSB**

| D-H...A    | D-H (Å) | H...A (Å) | D...A (Å) | D-H...A (°) | Symmetry operation for A |
|------------|---------|-----------|-----------|-------------|--------------------------|
| O1-H1...N9 | 0.84    | 1.88      | 2.622(5)  | 147.4       | x, y, z                  |

**Table S2:** C-H...O interaction parameters of **RBSB**

| C-H...O         | C-H (Å) | H...O (Å) | C...O (Å) | C-H...O (°) | Symmetry operation for O |
|-----------------|---------|-----------|-----------|-------------|--------------------------|
| C(8)-H(8)...O34 | 0.95    | 2.46      | 3.307(5)  | 148.6       | -x+1, -y+1, -z+1         |

**Table S3:** Lifetime decay parameters for **RBSB** in the presence and absence of Pd(II) in AIE active medium

| sample      | $\alpha_1$ | $\alpha_2$ | $\tau_1$ | $\tau_2$ | $\tau_{av}$ | $\chi_2$ | $K_1$ | $K_2$ |
|-------------|------------|------------|----------|----------|-------------|----------|-------|-------|
| RBSB        | 0.58       | 0.42       | 1.94     | 2.90     | 2.34        | 1.00     | 0.171 | 0.344 |
| RBSB-Pd(II) | 0.44       | 0.56       | 2.08     | 3.79     | 3.03        | 0.995    |       |       |
| RBSB-TNP    | 0.43       | 0.57       | 2.40     | 3.12     | 2.81        | 0.996    |       |       |

**Table S4:** Comparative study of literature reported probes for Pd(II) detection

| Compound                                                                            | Solvent/<br>Sensing<br>process                  | LOD                     | AIEE<br>property | Additional<br>analyte<br>detection/<br>TNP<br>detection | Applicati<br>on                                           | Refere<br>nce |
|-------------------------------------------------------------------------------------|-------------------------------------------------|-------------------------|------------------|---------------------------------------------------------|-----------------------------------------------------------|---------------|
| 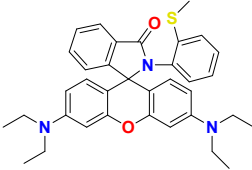 | MeCN/H <sub>2</sub> O<br>(8:2 v/v)/<br>Turn on  | 2.4 nm                  | No               | No/No                                                   | Paper<br>strip                                            | 01            |
| Al(III) MOF                                                                         | H <sub>2</sub> O/Turn<br>off                    | 120 nm                  | No               | No/No                                                   | Paper<br>strip                                            | 02            |
|  | THF/<br>Turn off                                | 0.97 nm                 | No               | No/No                                                   | Paper<br>strip,<br>Real<br>water,<br>Live cell<br>imaging | 03            |
|  | DMSO-H <sub>2</sub> O<br>(1:9 v/v)/<br>Turn off | $7.90 \times 10^{-8}$ M | Yes              | Cu(II)/No                                               | Live cell<br>imaging,<br>paper<br>strip                   | 04            |

|                                                                                     |                                                |                         |    |                                                 |                                   |    |
|-------------------------------------------------------------------------------------|------------------------------------------------|-------------------------|----|-------------------------------------------------|-----------------------------------|----|
| 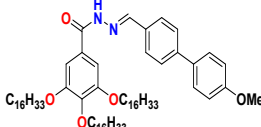   | DMF/<br>Turn off                               | $2.30 \times 10^{-8}$ M | No | H <sub>2</sub> PO <sub>4</sub> <sup>-</sup> /No | No                                | 05 |
|    | MeCN/H <sub>2</sub> O<br>(5:5 v/v)/<br>Turn on | 82 nm                   | No | No/No                                           | Live cell imaging                 | 06 |
|    | MeOH/PBS<br>(1:1 v/v)<br>Turn on               | 0.19 μM                 | No | No/No                                           | Paper strip,<br>Live cell imaging | 07 |
|    | MeCN/H <sub>2</sub> O<br>(4:1 v/v)/<br>Turn on | 11.9 μM                 | No | No/No                                           | Live cell imaging                 | 08 |
|   | MeOH/H <sub>2</sub> O<br>(1:1 v/v)/            | $9.80 \times 10^{-7}$ M | No | Cu(II)/No                                       | Paper strip                       | 09 |
|  | MeCN/H <sub>2</sub> O<br>(1:5 v/v)/<br>Turn on | 50 nm                   | No | No/No                                           | Live cell imaging                 | 10 |

## References

1. M. Wang, X. Liu, H. Lu, H. Wang, and Z. Qin, *ACS Appl. Mater. Interfaces* 2015, **7**, 2, 1284–1289.
2. P. Chakraborty, A. Rana, S. Mukherjee, and S. Biswas, *Inorg. Chem.* 2023, **62**, 2, 802–809.
3. F. Xu, D. Zhang, Q. Lu, R. Zhang, and J. Xia, *Talanta*, 2023, **253**, 123967.
4. P. Sharma, S. Kaur, S. Kaur and P. Singh, *Photochem. Photobiol. Sci.*, 2020, **19**, 504.
5. S. Wu, H. Jiang, Y. Zhang, L. Wu, P. Jiang, N. Ding, H. Zhang, L. Zhao, F. Yin, and Q. Yang, *Journal of Molecular Liquids*, 2021, **327**, 114836.
6. F. K. Tang, S. M. Chan, T. Wang, C. S. Kwan, R. Huang, Z. Cai, K. and C. F. Leung, *Talanta*, 2020, **210**, 12063.

7. M. Yang, Y. Bai, W. Meng, Z. Cheng, N. Su, and B. Yang, *Inorganic Chemistry Communications*, 2014, **46**, 310–314.
8. S. Mondal, S. K. Manna, S. Pathak, A. Al Masum and S. Mukhopadhyay, *New J. Chem.*, 2019, **43**, 3513-3519.
9. A. Kumar, Virender, B. Mohan, A. A. Solovev, M. Saini, and H. K. Sharma, *Microchemical Journal*, 2022, **180**, 107561.
10. A. K. Bhanja, S. Mishra, K. D. Saha and C. Sinha, *Dalton Trans.*, 2017, **46**, 9245-9252.
